# Supplementary material
Source: Springer Nature journal article supplement (https://www.springermedizin.de/resource/supplementary/12943_2009_537_MOESM5_ESM.pdf/9554696)

**A**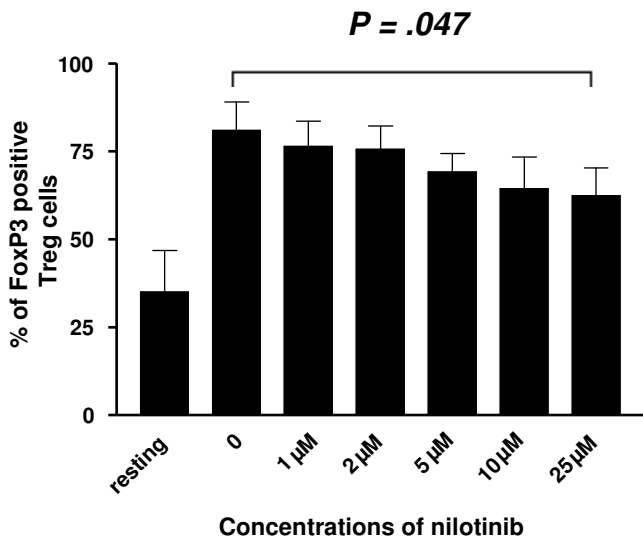**B**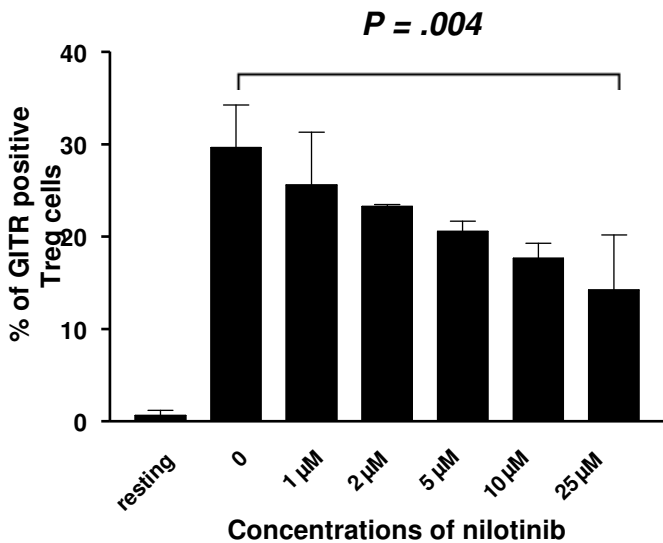

Supplement: MOESM5 [file 9554696]
